# Supplementary material for: Optimal assignment methods for ligand-based virtual screening
Source: Springer Nature journal article supplement (doi:10.1186/1758-2946-1-14), 2009-08-25
Supplement: Additional file 1 [file 1758-2946-1-14-s1.pdf]

## Descriptors of the Optimal Assignment Kernel

| descriptors | nominal                                                                                                                                                                                                             | numerical                                                                                                                                                                                                                                                                      |
|-------------|---------------------------------------------------------------------------------------------------------------------------------------------------------------------------------------------------------------------|--------------------------------------------------------------------------------------------------------------------------------------------------------------------------------------------------------------------------------------------------------------------------------|
| atom        | atom in acceptor, atom in donor, atom in don/acc, atom in terminal carbon, atom in aromatic system, atom in ring, atom in conjugated environment, atom is negative, atom is positive, atom is chiral, atom is axial | electrotopological state, partial charge, graph potentials, atom mass, atom electron affinity, atom VanderWaals volume, electrogeometrical state, atom EN (Pauling), intrinsic state, atom free electrons count, atom hybridisation, atom heavy valence, atom implicit valence |
| bond        | bond in aromatic system, bond in ring, bond is rotor, bond is carbonyl, bond is amide, bond is primary amide, bond is ester                                                                                         | Bond length                                                                                                                                                                                                                                                                    |

All descriptors were calculated using JOELib2<sup>1</sup>.

---

<sup>1</sup> <https://sourceforge.net/projects/joelib/>
